# Supplementary material for: Quality of life and its association with irritable bowel syndrome and fatigue ten years after giardiasis
Source: PubMed Central journal article supplement — Neurogastroenterol Motil. 2019 Feb 14;31(5):e13559. doi: 10.1111/nmo.13559 (PMC6849782; doi:10.1111/nmo.13559), 2019-02-14
Supplement: NMO-31-na-s001.pdf [file NMO-31-na-s001.pdf]

**Supplemental Table 1** Results from simple linear regression analysis of PCS and MCS ten years after a *Giardia*-outbreak with respect to eight-categories exposure (IBSxCFxExposure status) after three, six and ten years, respectively

| PCS                              | Estimated difference |         |          | P-value |         |          | N       |         |          |      |
|----------------------------------|----------------------|---------|----------|---------|---------|----------|---------|---------|----------|------|
|                                  | 3 years              | 6 years | 10 years | 3 years | 6 years | 10 years | 3 years | 6 years | 10 years |      |
| Exposure status                  |                      |         |          |         |         |          |         |         |          |      |
| Neither condition among controls | 55.5                 | 55.1    | 55.4     | ref     | ref     | ref      | 364     | 385     | 532      |      |
| Neither condition among exposed  | -0.2                 | 0.1     | -0.1     | .78     | .88     | .84      | 163     | 226     | 280      |      |
| IBS-only among controls          | -2.9                 | -2.0    | -4.4     | .022    | .097    | <.001    | 41      | 46      | 75       |      |
| IBS-only among exposed           | -2.7                 | -3.8    | -3.3     | .004    | <.001   | <.001    | 85      | 99      | 146      |      |
| CF-only among controls           | -4.6                 | -4.3    | -5.1     | .007    | .002    | <.001    | 22      | 36      | 50       |      |
| CF-only among exposed            | -4.3                 | -7.7    | -8.6     | <.001   | <.001   | <.001    | 68      | 44      | 45       |      |
| IBS and CF among controls        | -8.5                 | -9.7    | -7.5     | <.001   | <.001   | <.001    | 20      | 12      | 18       |      |
| IBS and CF among exposed         | -8.3                 | -8.7    | -13.1    | <.001   | <.001   | <.001    | 142     | 97      | 101      |      |
|                                  |                      |         |          |         |         |          | Total N | 905     | 945      | 1247 |

  

| MCS                              | Estimated difference |         |          | P-value |         |          | N       |         |          |      |
|----------------------------------|----------------------|---------|----------|---------|---------|----------|---------|---------|----------|------|
|                                  | 3 years              | 6 years | 10 years | 3 years | 6 years | 10 years | 3 years | 6 years | 10 years |      |
| Exposure status                  |                      |         |          |         |         |          |         |         |          |      |
| Neither condition among controls | 52.9                 | 52.9    | 53.4     | ref     | ref     | ref      | 368     | 390     | 536      |      |
| Neither condition among exposed  | -0.8                 | -1.3    | -1.4     | .35     | .058    | .023     | 164     | 226     | 282      |      |
| IBS-only among controls          | -2.6                 | 0.8     | -3.8     | .067    | .55     | <.001    | 42      | 46      | 75       |      |
| IBS-only among exposed           | -2.2                 | -3.3    | -3.6     | .036    | .001    | <.001    | 85      | 99      | 146      |      |
| CF-only among controls           | -5.8                 | -5.0    | -12.3    | .002    | .001    | <.001    | 22      | 36      | 51       |      |
| CF-only among exposed            | -5.3                 | -5.8    | -9.8     | <.001   | <.001   | <.001    | 68      | 44      | 45       |      |
| IBS and CF among controls        | -4.6                 | -4.9    | -10.1    | .021    | .049    | <.001    | 20      | 12      | 19       |      |
| IBS and CF among exposed         | -7.9                 | -9.5    | -11.5    | <.001   | <.001   | <.001    | 142     | 97      | 101      |      |
|                                  |                      |         |          |         |         |          | Total N | 911     | 950      | 1255 |

PCS = Physical component summary (0-100); MCS = Mental component summary (0-100); IBS = Irritable bowel syndrome; CF = Chronic fatigue  
 Non-significant p-values are highlighted
