# Supplementary material for: Quality of life and its association with irritable bowel syndrome and fatigue ten years after giardiasis
Source: PubMed Central journal article supplement — Neurogastroenterol Motil. 2019 Feb 14;31(5):e13559. doi: 10.1111/nmo.13559 (PMC6849782; doi:10.1111/nmo.13559), 2019-02-14
Supplement: NMO-31-na-s002.pdf [file NMO-31-na-s002.pdf]

**Supplemental Table 2** Results from simple logistic regression analysis of dichotomous PCS and MCS ten years after a *Giardia*-outbreak with respect to eight-categories exposure (IBSxCFxExposure status) after three, six and ten years, respectively

| PCS                              | OR for PCS below 45 |         |          | P-value |         |          | N       |         |          |      |
|----------------------------------|---------------------|---------|----------|---------|---------|----------|---------|---------|----------|------|
|                                  | 3 years             | 6 years | 10 years | 3 years | 6 years | 10 years | 3 years | 6 years | 10 years |      |
| Exposure status                  |                     |         |          |         |         |          |         |         |          |      |
| Neither condition among controls | ref                 | ref     | ref      | ref     | ref     | ref      | 364     | 385     | 532      |      |
| Neither condition among exposed  | 1.3                 | 1.0     | 1.0      | .52     | .97     | .99      | 163     | 226     | 280      |      |
| IBS-only among controls          | 2.4                 | 2.0     | 4.4      | .079    | .13     | <.001    | 41      | 46      | 75       |      |
| IBS-only among exposed           | 1.9                 | 2.6     | 2.4      | .11     | .003    | .003     | 85      | 99      | 146      |      |
| CF-only among controls           | 4.6                 | 3.4     | 6.1      | .006    | .005    | <.001    | 22      | 36      | 50       |      |
| CF-only among exposed            | 4.7                 | 8.8     | 14.0     | <.001   | <.001   | <.001    | 68      | 44      | 45       |      |
| IBS and CF among controls        | 10.5                | 12.9    | 6.9      | <.001   | <.001   | <.001    | 20      | 12      | 18       |      |
| IBS and CF among exposed         | 9.7                 | 8.1     | 17.4     | <.001   | <.001   | <.001    | 142     | 97      | 101      |      |
|                                  |                     |         |          |         |         |          | Total N | 905     | 945      | 1247 |

  

| MCS                              | OR for MCS below 45 |         |          | P-value |         |          | N       |         |          |      |
|----------------------------------|---------------------|---------|----------|---------|---------|----------|---------|---------|----------|------|
|                                  | 3 years             | 6 years | 10 years | 3 years | 6 years | 10 years | 3 years | 6 years | 10 years |      |
| Exposure status                  |                     |         |          |         |         |          |         |         |          |      |
| Neither condition among controls | ref                 | ref     | ref      | ref     | ref     | ref      | 368     | 390     | 536      |      |
| Neither condition among exposed  | 1.1                 | 1.4     | 1.6      | .74     | .14     | .030     | 164     | 226     | 282      |      |
| IBS-only among controls          | 1.5                 | 0.3     | 1.7      | .38     | .077    | .091     | 42      | 46      | 75       |      |
| IBS-only among exposed           | 2.3                 | 2.0     | 2.1      | .004    | .015    | .002     | 85      | 99      | 146      |      |
| CF-only among controls           | 2.8                 | 2.9     | 9.6      | .036    | .006    | <.001    | 22      | 36      | 51       |      |
| CF-only among exposed            | 3.9                 | 4.2     | 7.6      | <.001   | <.001   | <.001    | 68      | 44      | 45       |      |
| IBS and CF among controls        | 2.3                 | 1.9     | 15.9     | .11     | .36     | <.001    | 20      | 12      | 19       |      |
| IBS and CF among exposed         | 4.7                 | 7.4     | 11.4     | <.001   | <.001   | <.001    | 142     | 97      | 101      |      |
|                                  |                     |         |          |         |         |          | Total N | 911     | 950      | 1255 |

PCS = Physical component summary (0-100); MCS = Mental component summary (0-100); IBS = Irritable bowel syndrome; CF = Chronic fatigue  
 Non-significant p-values are highlighted
