# Supplementary material for: Quality of life and its association with irritable bowel syndrome and fatigue ten years after giardiasis
Source: PubMed Central journal article supplement — Neurogastroenterol Motil. 2019 Feb 14;31(5):e13559. doi: 10.1111/nmo.13559 (PMC6849782; doi:10.1111/nmo.13559), 2019-02-14
Supplement: NMO-31-na-s003.pdf [file NMO-31-na-s003.pdf]

**Supplemental Table 3** Results from simple linear regression analysis of PCS and MCS ten years after a *Giardia*-outbreak with IBS, CF and Exposure status as independent variables after three, six and ten years, respectively

| Regression model          | Outcome | 3 years                                 | 6 years | 10 years |
|---------------------------|---------|-----------------------------------------|---------|----------|
|                           |         | P-value for effect of status as exposed |         |          |
| Exposure status, IBS, CF  | PCS     | .99                                     | .37     | .26      |
|                           | MCS     | .28                                     | .002    | .14      |
|                           |         | P-value for interaction-term            |         |          |
| Exposure status, IBS, CF, | PCS     | .97                                     | .42     | <.001    |
| Exposure statusxCF        | MCS     | .57                                     | .50     | .027     |

PCS = Physical component summary (0-100); MCS = Mental component summary (0-100); IBS = Irritable bowel syndrome; CF = Chronic fatigue; Exposure status= Status as exposed or control

Non-significant p-values are highlighted
