# Supplementary material for: Quality of life and its association with irritable bowel syndrome and fatigue ten years after giardiasis
Source: PubMed Central journal article supplement — Neurogastroenterol Motil. 2019 Feb 14;31(5):e13559. doi: 10.1111/nmo.13559 (PMC6849782; doi:10.1111/nmo.13559), 2019-02-14
Supplement: NMO-31-na-s004.pdf [file NMO-31-na-s004.pdf]

**Supplemental Table 4** Means of the quality of life-subdomains of the short form 12 version 2 ten years after a *Giardia* -outbreak according to eight-categories exposure (IBSxCFxExposure status)

| Exposure status                  | Short form 12 version 2 subdomains |               |             |                |          |                    |                |               |
|----------------------------------|------------------------------------|---------------|-------------|----------------|----------|--------------------|----------------|---------------|
|                                  | Physical functioning               | Role physical | Bodily pain | General health | Vitality | Social functioning | Role emotional | Mental health |
| Neither condition among controls | 55.6                               | 54.9          | 54.8        | 56.1           | 53.1     | 54.0               | 53.5           | 55.2          |
| Neither condition among exposed  | 55.6                               | 54.2          | 54.4        | 56.3           | 51.1     | 53.6               | 52.8           | 54.0          |
| IBS-only among controls          | 52.5                               | 51.5          | 49.4        | 50.4           | 48.5     | 50.1               | 50.2           | 51.2          |
| IBS-only among exposed           | 54.0                               | 50.5          | 50.7        | 51.4           | 48.6     | 50.0               | 50.5           | 52.0          |
| CF-only among controls           | 50.6                               | 47.4          | 49.1        | 47.6           | 38.4     | 46.9               | 43.4           | 44.9          |
| CF-only among exposed            | 48.9                               | 44.2          | 50.2        | 44.2           | 38.1     | 44.4               | 45.0           | 48.2          |
| IBS and CF among controls        | 50.5                               | 46.2          | 45.7        | 45.8           | 40.9     | 43.1               | 44.2           | 47.3          |
| IBS and CF among exposed         | 46.1                               | 40.5          | 42.8        | 39.7           | 37.3     | 39.7               | 43.3           | 45.2          |

CF = Chronic fatigue; IBS = Irritable bowel syndrome: Exposure status= Status as exposed or control
